# Supplementary material for: Left Ventricle Segmental Longitudinal Strain and Regional Myocardial Work Index Could Help Determine Mitral Valve Prolapse Patients with Increased Risk of Ventricular Arrhythmias
Source: MDPI journal article supplement (doi:10.3390/jcdd10040181), 2023-04-20
Supplement: s1 [file s1]

# Supplementary materials

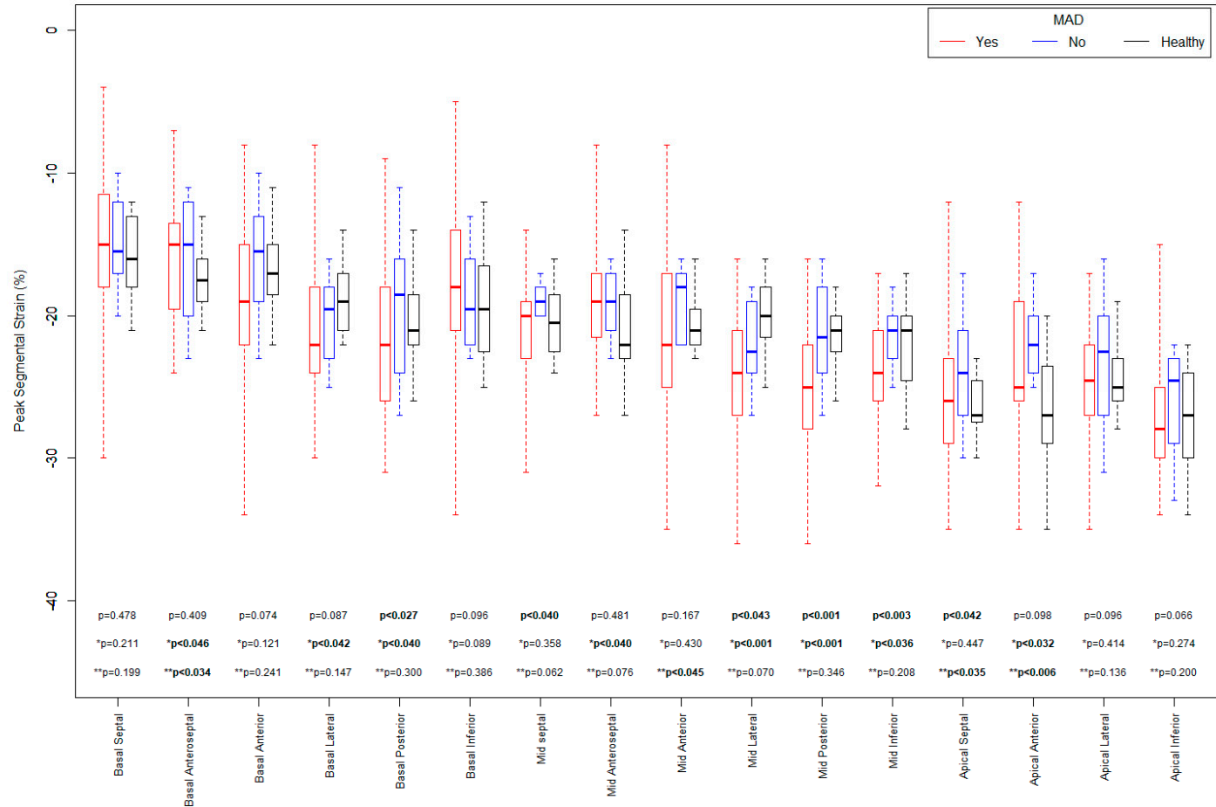

**Figure S1.** Peak Segmental Strain comparison between MAD+, MAD- and Healthy groups in sixteen segments.

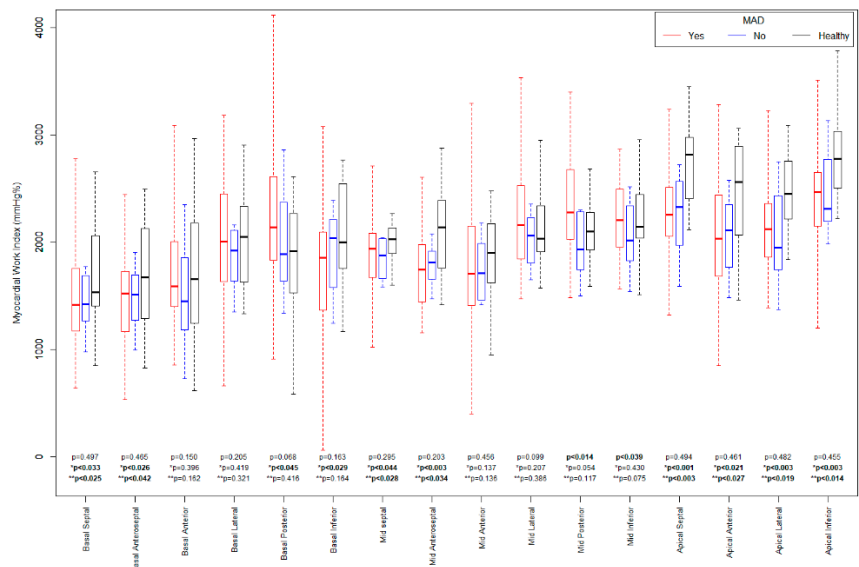

**Figure S2.** Myocardial Work Index comparison between MAD+, MAD- and Healthy groups in sixteen segments.

**Table S1.** The number of strains with abnormally increased peak segmental strain values

|                                                      | <b>MAD+<br/>n = 47</b> | <b>MAD-<br/>n = 25</b> | <b>Healthy<br/>n = 20</b> | <b>p*</b>        | <b>p**</b>       | <b>p***</b> |
|------------------------------------------------------|------------------------|------------------------|---------------------------|------------------|------------------|-------------|
| <b>Peak segmental strain ≥ 25% for all segments</b>  | 8 (5 - 9)              | 3 (1 - 6)              | 4 (3 - 5)                 | <b>0.005</b>     | <b>0.040</b>     | 0.103       |
| <b>Peak segmental strain ≥ 25% for basal</b>         | 2 (1 - 2)              | 1 (0 - 1)              | 0 (0 - 0)                 | <b>0.014</b>     | <b>0.004</b>     | 0.359       |
| <b>Peak segmental strain ≥ 25% for basal and mid</b> | 3 (3 - 5)              | 1 (1 - 3)              | 0 (0 - 1)                 | <b>&lt;0.000</b> | <b>&lt;0.000</b> | 0.354       |

p\* - p between MAD+ and MAD-; p\*\* - p between MAD+ and Healthy; p\*\*\* - p between MAD- and Healthy

MAD – mitral annular disjunction

**Table S2.** Inter- and Intra-Observer Variability of GLS, peak segmental strains and segmental MW index values

|                                  | <b>Intra - Observer</b> |                                |            |               | <b>Inter - Observer</b> |                                |            |               |
|----------------------------------|-------------------------|--------------------------------|------------|---------------|-------------------------|--------------------------------|------------|---------------|
|                                  | <b>Bias</b>             | <b>95% Limits of Agreement</b> | <b>ICC</b> | <b>CV (%)</b> | <b>Bias</b>             | <b>95% Limits of Agreement</b> | <b>ICC</b> | <b>CV (%)</b> |
| <b>Peak segmental strain (%)</b> | - 0.74                  | - 0.35 to -1.12                | 0.87*      | 17            | 0.86                    | 0.48 to 1.25                   | 0.83*      | 17            |
| <b>MW index (mmHg%)</b>          | 119.36                  | 90.86 to 147.86                | 0.92       | 14            | -88.95                  | -61.48 to -114.44              | 0.88       | 13            |

\*p < 0.001. ICC - intra-class correlation coefficient, CV – coefficient of variation, MW – myocardial work

**Video S1.** Transthoracic echocardiography (long-axis parasternal view) of MVP patient with MAD presence (systolic separation of the mitral leaflet and left atrial junction from the summit to the left ventricular posterior wall).
